# Supplementary material for: Hydrous TiO2@polypyrrole hybrid nanocomposite as an efficient selective scavenger for the defluoridation of drinking water
Source: Royal Society of Chemistry journal article supplement (doi:10.1039/c6ra20151b), 2016-01-01
Supplement: c6ra20151b1.pdf [file c6ra20151b1.pdf]

### Supplementary information

## Hydrous TiO<sub>2</sub>@polypyrrole hybrid nanocomposite as an efficient selective scavenger for defluoridation of drinking water

Kamya Parashar<sup>a</sup>, Niladri Ballav<sup>a</sup>, Sushanta Debnath<sup>b</sup>, Kriveshini Pillay<sup>a\*</sup>, Arjun Maity<sup>a,c\*</sup>

<sup>a</sup>*Department of Applied Chemistry, University of Johannesburg, Johannesburg, South Africa*

<sup>b</sup>*Saha Institute of Nuclear Physics, Kolkata, West Bengal, India*

<sup>c</sup>*DST/CSIR National Centre for Nanostructured Materials, Council for Scientific and Industrial Research (CSIR), Pretoria, South Africa*

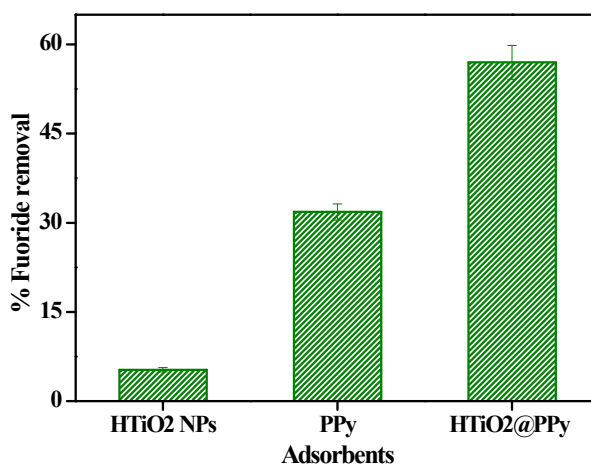

**Fig. S1.** Percentage F<sup>-</sup> removal obtained using HTiO<sub>2</sub> NPs, PPy and as-synthesized HTiO<sub>2</sub>@PPy for initial F<sup>-</sup> concentration 30 mg/L; pH = 6.5 (±0.2); T = 25 (±0.1) °C and contact time 24 h.

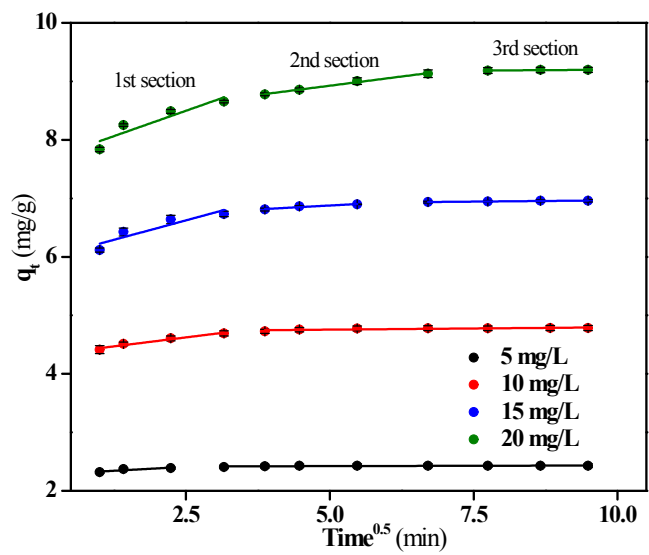

**Fig. S2.** Intraparticle diffusion mode fit of kinetic data for F<sup>-</sup> adsorption by HTiO<sub>2</sub>@PPy at different initial concentrations.

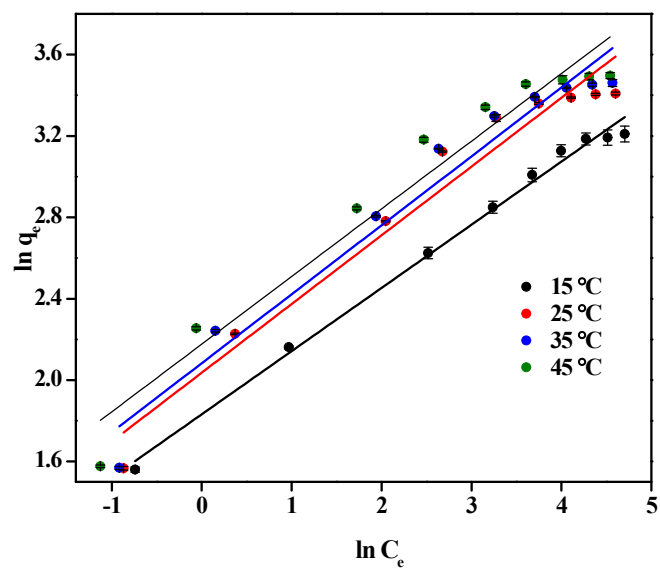

**Fig. S3.** F<sup>-</sup> adsorption isotherm data fit with Freundlich model

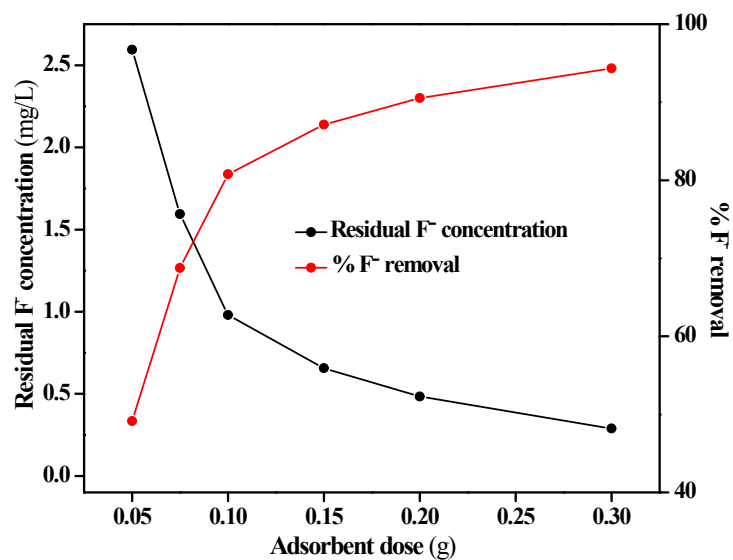

**Fig. S4.** Effect of adsorbent dosage on % F<sup>-</sup> removal conducted using simulated real field ground water with initial F<sup>-</sup> concentration 5.1 mg/L; pH = 7.4; T = 25 (±0.1) °C and contact time 24 h.

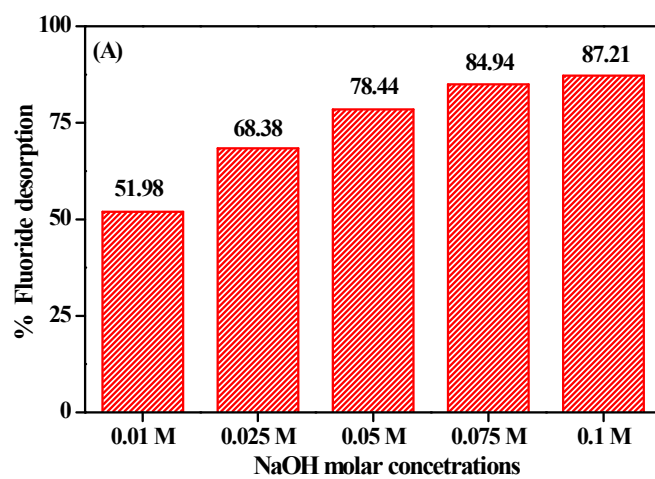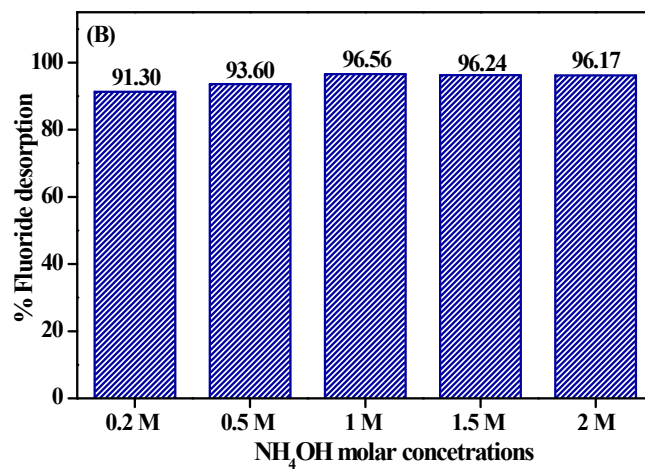

**Fig. S5.** Percentage desorption obtained using (A) sodium hydroxide (NaOH) and (B) ammonium hydroxide (NH<sub>4</sub>OH).

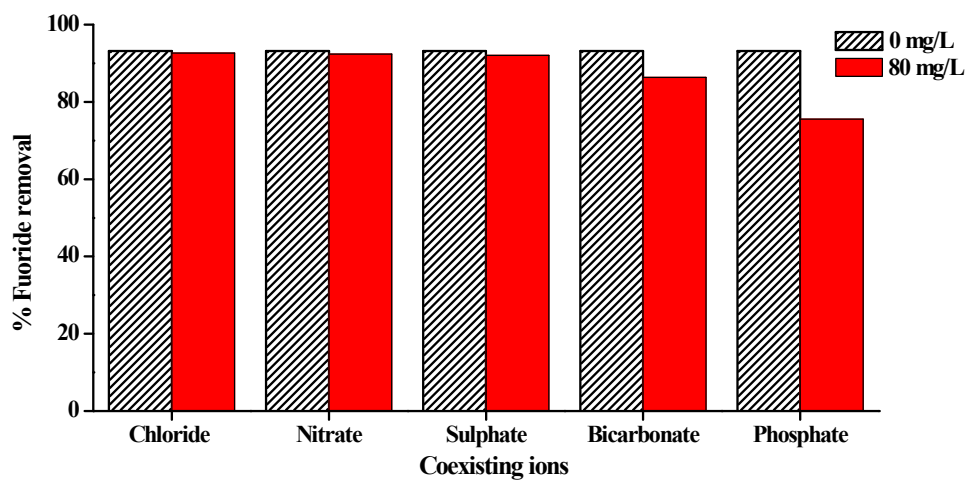

**Fig. S6.** Effect of coexisting ions on the fluoride removal efficiency of  $\text{HTiO}_2@\text{PPy}$  at the concentration of 80 mg/L.

**Table S1**Comparison of kinetic parameters of F<sup>-</sup> sorption by HTiO<sub>2</sub>@PPy with other adsorbents.

| Adsorbents                                                                       | Initial concentration (mg/L) | Equilibrium time | Rate constant $k_2$ (g/mg.min) | References   |
|----------------------------------------------------------------------------------|------------------------------|------------------|--------------------------------|--------------|
| Crystalline TiO <sub>2</sub>                                                     | 5                            | na               | 2.17                           | [48]         |
| $\gamma$ -AlOOH@CS magnetic NPs                                                  | 12                           | 40 min           | 0.043                          | [49]         |
| PPy/chitosan composite                                                           | 10                           | 30 min           | na                             | [18]         |
| Chitosan/montemorillonite/ZrO <sub>2</sub>                                       | 10                           | 60 min           | 0.151                          | [51]         |
| Polypyrrole                                                                      | 10                           | na               | 1.75                           | [17]         |
| Sulfate doped Fe <sub>3</sub> O <sub>4</sub> /Al <sub>2</sub> O <sub>3</sub> NPs | 11                           | na               | 19.91                          | [49]         |
| PPy/HSnO nanocomposites                                                          | 10                           | 30 min           | 0.19                           | [21]         |
| PPy/alumina composite                                                            | 10                           | 20 min           | 1.7                            | [19]         |
| Zr-alginate beads                                                                | 20                           | 20 h             | $1.28 \times 10^{-3}$          | [52]         |
| HTiO <sub>2</sub> @PPy                                                           | 10                           | 10 min           | 2.25                           | Present work |
